# Supplementary material for: Feasibility of Community Pharmacist-Initiated and Point-of-Care CYP2C19 Genotype-Guided De-Escalation of Oral P2Y12 Inhibitors
Source: Genes (Basel). 2023 Feb 25;14(3):578. doi: 10.3390/genes14030578 (PMC10048116; doi:10.3390/genes14030578)
Supplement: Supplementary file 1 [file genes-14-00578-s001.zip]

Archive with 9 entries (9 files):
- Figure S1 Overview of participating community pharmacies.pdf
- Figure S2 De-escalation rate to clopidogrel per community pharmacy group.pdf
- Supplementary File S1 Cardiologist letter and survey.pdf
- Supplementary File S2 Cost analysis.xlsx
- Table S1 Overview of questions included in patient survey.xlsx
- Table S2 Overview of questions included in community pharmacist survey.xlsx
- Table S3 Patient survey results.xlsx
- Table S4 Pharmacist and Cardiologist demographics.xlsx
- Table S5 Barrier scores and matrix ranking of community pharmacists.xlsx
