# Supplementary material for: Feasibility of Community Pharmacist-Initiated and Point-of-Care CYP2C19 Genotype-Guided De-Escalation of Oral P2Y12 Inhibitors
Source: Genes (Basel). 2023 Feb 25;14(3):578. doi: 10.3390/genes14030578 (PMC10048116; doi:10.3390/genes14030578)
Supplement: Supplementary file 1 [file genes-14-00578-s001.zip › Supplementary File S2 Cost analysis.xlsx]

## Sheet: Policy Table
		De-escalation rate	Average duration of treatment impact (in months)	Use of Ticagrelor versus Prasugrel	Change in total costs due to POC testing (per patient)	Costs per prevented PLATO major or minor bleeding (in €)			Number needed to have one switch	Number needed to prevent one PLATO major or minor bleeding
Outcome as observed in this study		0.2	10.8455	0.88	54	16766			7.56865	310.483
Alternative scenarios
1	Improved de-escalation	0.4	10.8455	0.88	-43	Cost saving			3.78432	155.241
2	Full de-escalation	1	10.8455	0.88	-332	Cost saving			1.51373	62.0966
3	Early testing in non-chronic users	0.2	14.7134	0.88	19	4348			7.56865	228.861
4	5-year impact in chronic users	0.2	17.732	0.88	-7	Cost saving			7.56865	189.901
5	Testing only in non-chronic users	0.2	7.16504	0.88	86	40417			7.56865	469.968
6	Testing only early in non-chronic users	0.2	12	0.88	43	12066			7.56865	280.612
7	Testing only in chronic users	0.2	25.5672	0.88	-77	Cost saving			7.56865	131.705
8	Testing only in Prasugrel users	0.2	10.8455	0	99	30738			7.56865	310.483
9	Testing only in Ticagrelor users	0.2	10.8455	1	48	14903			7.56865	310.483

## Sheet: Parameters
Parameters	Value	Unit					Drug Costs [14]
Costs POC PGx Testing	150	€/patient	Drug costs per day	Pills per day	Cost per pill		per year (€)	per month (€)
Costs Clopidogrel [5]	1.52083	€/month	0.05	1	0.05	GREPID TABLET FILMOMHULD 75MG	18.25	1.52083
Costs Prasugrel [5]	37.4125	€/month	1.23	1	1.23	PRASUGREL TEVA TABLET FILMOMHULD 5MG	602.25	50.1875
Costs Ticagrelor for standard use [5]	72.3917	€/month	2.38	2	1.19	BRILIQUE TABLET FILMOMHULD 90MG	795.7	66.3083
Costs Ticagrelor for chronic use [5]	75.4333	€/month	2.48	2	1.24	BRILIQUE TABLET FILMOMHULD 60MG
Standard remaining treatment duration	7.16504	months
Chronic users' remaining treatment duration*	25.5672	months
Share of chronic users	0.2
Ratio Ticagrelor versus Prasugrel	0.88
Succesfull test	0.986
Eligibility (CYP2C19 EM + UM)	0.67
De-escalation Rate	0.2
		Standard-Treatment Group	Genotype-Guided Group
Number needed to switch to prevent one PLATO major or minor bleeding per year** [14]	37.0755	0.125201	0.0982287
**Assuming that the number of prevented PLATO major or minor bleeding is proportional to the treatment duration
* estimated from the already passed treatment duration

## Sheet: Therapy Duration
			Break	12
			Share	0.8
			mu	0.0419297		24.7732
			Mean	23.8494
Patient ID	P2Y12 therapy duration at study inclusion	Cumulative		Model	Weight	Error
0	0	0			1	0
1	0.37	0.00694444			1	4.82253e-05
2	0.37	0.0138889			1	0.000192901
3	0.43	0.0208333			1	0.000434028
4	0.73	0.0277778			1	0.000771605
5	0.8	0.0347222			1	0.00120563
6	0.8	0.0416667			1	0.00173611
7	0.87	0.0486111			1	0.00236304
8	1.03	0.0555556			1	0.00308642
9	1.03	0.0625			1	0.00390625
10	1.17	0.0694444			1	0.00482253
11	1.23	0.0763889			1	0.00583526
12	1.43	0.0833333			1	0.00694444
13	1.5	0.0902778			1	0.00815008
14	1.57	0.0972222			1	0.00945216
15	1.57	0.104167			1	0.0108507
16	1.63	0.111111			1	0.0123457
17	1.67	0.118056			1	0.0139371
18	1.67	0.125			1	0.015625
19	1.73	0.131944			1	0.0174093
20	1.73	0.138889			1	0.0192901
21	1.9	0.145833			1	0.0212674
22	2.03	0.152778			1	0.023341
23	2.07	0.159722			1	0.0255112
24	2.07	0.166667			1	0.0277778
25	2.17	0.173611			1	0.0301408
26	2.17	0.180556			1	0.0326003
27	2.2	0.1875			1	0.0351563
28	2.3	0.194444			1	0.0378086
29	2.67	0.201389			1	0.0405575
30	2.7	0.208333			1	0.0434028
31	2.7	0.215278			1	0.0463445
32	2.8	0.222222			1	0.0493827
33	2.8	0.229167			1	0.0525174
34	2.83	0.236111			1	0.0557485
35	2.83	0.243056			1	0.059076
36	2.9	0.25			1	0.0625
37	2.93	0.256944			1	0.0660204
38	3	0.263889			1	0.0696373
39	3.03	0.270833			1	0.0733507
40	3.2	0.277778			1	0.0771605
41	3.3	0.284722			1	0.0810667
42	3.43	0.291667			1	0.0850694
43	3.47	0.298611			1	0.0891686
44	3.67	0.305556			1	0.0933642
45	3.8	0.3125			1	0.0976562
46	3.83	0.319444			1	0.102045
47	3.87	0.326389			1	0.10653
48	3.87	0.333333			1	0.111111
49	4.03	0.340278			1	0.115789
50	4.07	0.347222			1	0.120563
51	4.2	0.354167			1	0.125434
52	4.23	0.361111			1	0.130401
53	4.3	0.368056			1	0.135465
54	4.3	0.375			1	0.140625
55	4.43	0.381944			1	0.145882
56	4.43	0.388889			1	0.151235
57	4.53	0.395833			1	0.156684
58	4.6	0.402778			1	0.16223
59	4.8	0.409722			1	0.167872
60	4.97	0.416667			1	0.173611
61	5.03	0.423611			1	0.179446
62	5.03	0.430556			1	0.185378
63	5.07	0.4375			1	0.191406
64	5.13	0.444444			1	0.197531
65	5.13	0.451389			1	0.203752
66	5.27	0.458333			1	0.210069
67	5.27	0.465278			1	0.216483
68	5.3	0.472222			1	0.222994
69	5.57	0.479167			1	0.229601
70	5.6	0.486111			1	0.236304
71	5.9	0.493056			1	0.243104
72	5.9	0.5			1	0.25
73	5.9	0.506944			1	0.256993
74	6	0.513889			1	0.264082
75	6	0.520833			1	0.271267
76	6.07	0.527778			1	0.278549
77	6.2	0.534722			1	0.285928
78	6.47	0.541667			1	0.293403
79	6.57	0.548611			1	0.300974
80	6.57	0.555556			1	0.308642
81	6.87	0.5625			1	0.316406
82	6.87	0.569444			1	0.324267
83	7	0.576389			1	0.332224
84	7.03	0.583333			1	0.340278
85	7.07	0.590278			1	0.348428
86	7.1	0.597222			1	0.356674
87	7.1	0.604167			1	0.365017
88	7.17	0.611111			1	0.373457
89	7.27	0.618056			1	0.381993
90	7.3	0.625			1	0.390625
91	7.33	0.631944			1	0.399354
92	7.5	0.638889			1	0.408179
93	7.53	0.645833			1	0.417101
94	7.67	0.652778			1	0.426119
95	7.7	0.659722			1	0.435233
96	7.77	0.666667			1	0.444444
97	7.8	0.673611			1	0.453752
98	7.83	0.680556			1	0.463156
99	7.87	0.6875			1	0.472656
100	7.9	0.694444			1	0.482253
101	7.97	0.701389			1	0.491946
102	8.03	0.708333			1	0.501736
103	8.03	0.715278			1	0.511622
104	8.37	0.722222			1	0.521605
105	8.47	0.729167			1	0.531684
106	8.6	0.736111			1	0.54186
107	8.63	0.743056			1	0.552132
108	9.2	0.75			1	0.5625
109	9.37	0.756944			1	0.572965
110	9.37	0.763889			1	0.583526
111	9.53	0.770833			1	0.594184
112	9.67	0.777778			1	0.604938
113	10.1	0.784722			1	0.615789
114	11.03	0.791667			1	0.626736
115	11.23	0.798611			1	0.63778
116	12.8	0.805556		0.806597	1	1.08561e-06
117	14.5	0.8125		0.819903	1	5.48109e-05
118	17.97	0.819444		0.84429	1	0.000617288
119	19.43	0.826389		0.853536	1	0.000736965
120	19.8	0.833333		0.855791	1	0.000504333
121	20.87	0.840278		0.862118	1	0.000476979
122	20.87	0.847222		0.862118	1	0.000221873
123	21.83	0.854167		0.867558	1	0.000179315
124	22.3	0.861111		0.870142	1	8.15569e-05
125	22.33	0.868056		0.870305	1	5.06109e-06
126	23.8	0.875		0.878058	1	9.35024e-06
127	25.37	0.881944		0.885827	1	1.5072e-05
128	26.67	0.888889		0.891884	1	8.96804e-06
129	27.4	0.895833		0.895143	1	4.76941e-07
130	28.53	0.902778		0.899995	1	7.74353e-06
131	29.33	0.909722		0.903294	1	4.13225e-05
132	30.17	0.916667		0.906641	1	0.000100519
133	30.2	0.923611		0.906758	1	0.000284023
134	31.97	0.930556		0.913428	1	0.000293368
135	32.93	0.9375		0.916843	1	0.000426707
136	33.27	0.944444		0.91802	1	0.000698241
137	38.87	0.951389		0.935177	1	0.000262838
138	54.1	0.958333		0.965771	1	5.53167e-05
139	58.03	0.965278		0.970971	1	3.24133e-05
140	66.97	0.972222		0.980046	1	6.12075e-05
141	70.47	0.979167		0.982769	1	1.29795e-05
142	72.77	0.986111		0.984353	1	3.08936e-06
143	89.43	0.993056		0.992219	1	7.00042e-07
144	126.47	1		0.998354	1	2.71082e-06
