# Supplementary material for: Feasibility of Community Pharmacist-Initiated and Point-of-Care CYP2C19 Genotype-Guided De-Escalation of Oral P2Y12 Inhibitors
Source: Genes (Basel). 2023 Feb 25;14(3):578. doi: 10.3390/genes14030578 (PMC10048116; doi:10.3390/genes14030578)
Supplement: Supplementary file 1 [file genes-14-00578-s001.zip › Table S1 Overview of questions included in patient survey.xlsx]

## Sheet: Sheet1
Theme	Question	Answer
General	Gender (male/female)	1. Male 2. Female
	Date of birth
	Lentgh (m)
	Weight (kg)
	Highest level of education	1. Master’s degree 2. Bachelor’s degree 3. Secondary education degree 4. No education/degree
	Ethnicity	1. Caucasian (European, Mediterranean, Middle Eastern) 2. African 3. (South East) Asian (Burmese, Chinese, Japanese, Korean, Mongolian, Vietnamese) 4. West Asian (Pakistani, Indian) 5. Hispanic (Mexican-American, Mexican, Central or South American) 6. Other (mixed ethnicity)
Added value of pharmacogenetic testing	I can see the benefit of DNA testing in drug use	1. Completely disagree 2. Disagree 3. Don't agree, don't disagree 4. Agree 5. Completely agree
	I am convinced that drug treatment is safer and more effective when using a DNA test than when it is not done	1. Completely disagree 2. Disagree 3. Don't agree, don't disagree 4. Agree 5. Completely agree
	I would like to do a DNA test in the future before starting a drug	1. Completely disagree 2. Disagree 3. Don't agree, don't disagree 4. Agree 5. Completely agree
	I would rather choose a DNA test that is important to the drug I am currently taking than a full DNA test	1. Completely disagree 2. Disagree 3. Don't agree, don't disagree 4. Agree 5. Completely agree
	I now understand how a DNA test can be applied in health care	1. Completely disagree 2. Disagree 3. Don't agree, don't disagree 4. Agree 5. Completely agree
	What might discourage you from taking a DNA test?	Free text field
Pharmacogenetic testing in community pharmacy	Community pharmacy is an appropiate location for DNA-testing	1. Completely disagree 2. Disagree 3. Don't agree, don't disagree 4. Agree 5. Completely agree
	I would rather do a DNA- test at the pharmacy than in a laboratory or in a hospital	1. Completely disagree 2. Disagree 3. Don't agree, don't disagree 4. Agree 5. Completely agree
	Can you also elaborate on why this is your preference?	Free text field
	Taking the DNA-test at the pharmacy was easy	1. Completely disagree 2. Disagree 3. Don't agree, don't disagree 4. Agree 5. Completely agree
Sharing pharmacogenetic test results	I have concerns about who can see the results of my DNA test	1. Completely disagree 2. Disagree 3. Don't agree, don't disagree 4. Agree 5. Completely agree
	I approve of the pharmacist having access to my DNA test results	1. Completely disagree 2. Disagree 3. Don't agree, don't disagree 4. Agree 5. Completely agree
	I would share DNA test results with my doctors	1. Completely disagree 2. Disagree 3. Don't agree, don't disagree 4. Agree 5. Completely agree
	I shared the results of the DNA test with others	1. Completely disagree 2. Disagree 3. Don't agree, don't disagree 4. Agree 5. Completely agree
Pharmacist-patient communication	The pharmacist explained the DNA test in a way that was easy to understand	1. Completely disagree 2. Disagree 3. Don't agree, don't disagree 4. Agree 5. Completely agree
	The pharmacist provided clear information on potential changes to the antiplatelet drug	1. Completely disagree 2. Disagree 3. Don't agree, don't disagree 4. Agree 5. Completely agree
	I have confidence in the pharmacist when it comes to conducting and interpreting a DNA test	1. Completely disagree 2. Disagree 3. Don't agree, don't disagree 4. Agree 5. Completely agree
	I was able to ask the pharmacist the questions I wanted to	1. Completely disagree 2. Disagree 3. Don't agree, don't disagree 4. Agree 5. Completely agree
Current study	What are the positives of this study for you?	Free text field
	What are the negatives of this study for you?	Free text field
	Do you have any questions or comments?	Free text field
