# Supplementary material for: Feasibility of Community Pharmacist-Initiated and Point-of-Care CYP2C19 Genotype-Guided De-Escalation of Oral P2Y12 Inhibitors
Source: Genes (Basel). 2023 Feb 25;14(3):578. doi: 10.3390/genes14030578 (PMC10048116; doi:10.3390/genes14030578)
Supplement: Supplementary file 1 [file genes-14-00578-s001.zip › Table S2 Overview of questions included in community pharmacist survey.xlsx]

## Sheet: Sheet1
Theme	Question	Answer
General	What is your age?	Free text field
	What is your gender?	1.Male 2.Female
	What is your position in the pharmacy?	1. Community pharmacist specialist 2. Community pharmacist in training 3. Pharmacist 4. Second pharmacist 5. Managing pharmacist
	How would you describe the location of your pharmacy?	1.City 2.Rural
	Is the pharmacy located in a health center?	1.Yes 2.No
	How long have you been working in community pharmacy as a pharmacist?	Free text field
Knowledge and Experience	Can you indicate how much knowledge you have about PGx?	0 = no knowledge at all / 1 / 2 / 3 / 4 / 5 / 6 / 7 / 8 / 9 / 10 = complete knowledge
	How often have you seen PGx results from patients so far?	1. More than 10 patients 2. 6 to 10 patients 3. 1 to 5 patients 4. This is the first time
	Has PGx testing ever been performed on your initiative?	1.Yes 2.No
Current Study	Why did you participate in the study?	Free text field
	How was the communication with patients about PGx? (Sufficient skills present? How should/could the division of labor in the pharmacy be?)	Very well / well / reasonable / bad / very bad + free text field
	How did you communicate medication change proposals following POC PGx-testing to prescribers and how often did prescribers take your recommendations? (Can you elaborate)	Free text field
Attitude and Perception	I think POC PGx- testing in the community pharmacy has added value compared to PGx in hospital or laboratorium (Can you elaborate?)	1. Completely disagree 2. Disagree 3. Don't agree, don't disagree 4. Agree 5. Completely agree + Free text field
	I would like to use POC PGx- testing (more) in pharmacy (Can you elaborate?)	1. Completely disagree 2. Disagree 3. Don't agree, don't disagree 4. Agree 5. Completely agree + Free text field
	I need more support to apply POC PGx-testing in pharmacy (Can you elaborate?)	1. Completely disagree 2. Disagree 3. Don't agree, don't disagree 4. Agree 5. Completely agree + Free text field
	Please rank the following factors from 1 to 10 in the order in which you think they are most prohibitive to POC PGx-testing (1 = greatest barrier and 10 = smallest barrier; use each number once)	1. Limited space in pharmacy 2. Lack of reimbursement for POC PGx-testing 3. Limited time to commit to PGx-testing 4.Costs associated with POC PGx-testing 5. Knowledge of PGx 6. Lack of interest from patients 7. Insufficient pharmacy staff to provide PGx-testing 8. Poor adherence to recommendations by physicians 9.Limited perceived added value to current practice 10. Not knowing if a patient has …
	Statement: My patients are resistant to POC PGx-testing (Can you elaborate?)	1. Completely disagree 2. Disagree 3. Don't agree, don't disagree 4. Agree 5. Completely agree + Free text field
Communication	Which healthcare provider should discuss POC PGx-testing results with the patient? (Can you elaborate?)	1. Pharmacist 2. Treating physician in hospital 3. General practitioner 4. Clinical geneticist other 5. Other + Free text field
Closing	Room for comments	Free text field
Abbreviations
PGx: Pharmacogenetics
POC: Point Of Care
