# Supplementary material for: Feasibility of Community Pharmacist-Initiated and Point-of-Care CYP2C19 Genotype-Guided De-Escalation of Oral P2Y12 Inhibitors
Source: Genes (Basel). 2023 Feb 25;14(3):578. doi: 10.3390/genes14030578 (PMC10048116; doi:10.3390/genes14030578)
Supplement: Supplementary file 1 [file genes-14-00578-s001.zip › Table S3 Patient survey results.xlsx]

## Sheet: Tables
Likert Scale Score	I can see the benefit of DNA testing in drug use	I am convinced that drug treatment is safer and more effective when using a DNA test than when it is not done	I would like to do a DNA test in the future before starting a drug	I would rather choose a DNA test that is important to the drug I am currently taking than a full DNA	I now understand how a DNA test can be applied in health care	Community pharmacy is an appropiate location for DNA-testing	I would rather do a DNA- test at the pharmacy than in a laboratory or in a hospital	Taking the DNA-test at the pharmacy was easy	I have concerns about who can see the results of my DNA test	I approve of the pharmacist having access to my DNA test results	I would share DNA test results with my doctors	I shared the results of the DNA test with others	The pharmacist explained the DNA test in a way that was easy to understand	The pharmacist provided clear information on potential changes to the antiplatelet drug	I have confidence in the pharmacist when it comes to conducting and interpreting a DNA test	I was able to ask the pharmacist the questions I wanted to
1	2	2	11	26	6	3	4	0	76	1	0	22	7	6	3	3
2	3	1	17	24	1	1	2	0	22	1	0	14	3	5	1	1
3	18	31	28	13	9	5	41	0	7	2	4	10	1	7	5	2
4	19	30	24	20	29	11	9	2	7	14	3	25	11	14	22	6
5	77	54	39	35	74	98	63	115	7	101	112	48	92	80	85	104
Total (n)	119	118	119	118	119	118	119	117	119	119	119	119	114	112	116	116
	Added value of pharmacogenetic testing
	Completely disagree		Disagree		Don't agree, don't disagree		Agree		Completely agree
Statement	N	%	N	%	N	%	N	%	N	%
I can see the benefit of DNA testing in drug use (n=119)	2	0.0168067	3	0.0252101	18	0.151261	19	0.159664	77	0.647059
I am convinced that drug treatment is safer and more effective when using a DNA test than when it is not done (n=118)	2	0.0168067	1	0.00840336	31	0.260504	30	0.252101	54	0.453782
I would like to do a DNA test in the future before starting a drug (n=119)	11	0.092437	17	0.142857	28	0.235294	24	0.201681	39	0.327731
I would rather choose a DNA test that is important to the drug I am currently taking than a full DNA test (n=118)	26	0.220339	24	0.20339	13	0.110169	20	0.169492	35	0.29661
I now understand how a DNA test can be applied in health care (n=119)	6	0.0504202	1	0.00840336	9	0.0756303	29	0.243697	74	0.621849
	Pharmacogenetic testing in community pharmacy
	Completely disagree		Disagree		Don't agree, don't disagree		Agree		Completely agree
Statement	N	%	N	%	N	%	N	%	N	%
Community pharmacy is an appropiate location for DNA-testing (n=118)	3	0.0254237	1	0.00847458	5	0.0423729	11	0.0932203	98	0.830508
I would rather do a DNA- test at the pharmacy than in a laboratory or in a hospital (n=119)	4	0.0336134	2	0.0168067	41	0.344538	9	0.0756303	63	0.529412
Taking the DNA-test at the pharmacy was easy (n=117)	0	0	0	0	0	0	2	0.017094	115	0.982906
	Sharing pharmacogenetic test results
	Completely disagree		Disagree		Don't agree, don't disagree		Agree		Completely agree
Stelling	N	%	N	%	N	%	N	%	N	%
I have concerns about who can see the results of my DNA test (n=119)	76	0.638655	22	0.184874	7	0.0588235	7	0.0588235	7	0.0588235
I approve of the pharmacist having access to my DNA test results (n=119)	1	0.00840336	1	0.00840336	2	0.0168067	14	0.117647	101	0.848739
I would share DNA test results with my doctors (n=119)	0	0	0	0	4	0.0336134	3	0.0252101	112	0.941176
I shared the results of the DNA test with others (n=119)	22	0.184874	14	0.117647	10	0.0840336	25	0.210084	48	0.403361
	Pharmacist-patient communication
	Completely disagree		Disagree		Don't agree, don't disagree		Agree		Completely agree
Statement	N	%	N	%	N	%	N	%	N	%
The pharmacist explained the DNA test in a way that was easy to understand (n=114)	7	0.0614035	3	0.0263158	1	0.00877193	11	0.0964912	92	0.807018
The pharmacist provided clear information on potential changes to the antiplatelet drug (n=112)	6	0.0535714	5	0.0446429	7	0.0625	14	0.125	80	0.714286
I have confidence in the pharmacist when it comes to conducting and interpreting a DNA test (n=116)	3	0.0258621	1	0.00862069	5	0.0431034	22	0.189655	85	0.732759
I was able to ask the pharmacist the questions I wanted to (n=116)	3	0.0258621	1	0.00862069	2	0.0172414	6	0.0517241	104	0.896552
