# Supplementary material for: Feasibility of Community Pharmacist-Initiated and Point-of-Care CYP2C19 Genotype-Guided De-Escalation of Oral P2Y12 Inhibitors
Source: Genes (Basel). 2023 Feb 25;14(3):578. doi: 10.3390/genes14030578 (PMC10048116; doi:10.3390/genes14030578)
Supplement: Supplementary file 1 [file genes-14-00578-s001.zip › Table S4 Pharmacist and Cardiologist demographics.xlsx]

## Sheet: Sheet1
Participant characteristics	Community pharmacists (n)	Treating Physicians (n)
Total survey participants	14	8
Age
Mean	35 (14/14)	44 years (7/8)
Range	25 - 51 years (14/14)	30 - 49 years (7/8)
Gender
Male	29% (4/14)	63% (5/7)
Female	71% (10/14)	38% (2/7)
Current position
Medical Specialist, department Cardiology		88% (7/8)
Physician-Researcher, department Cardiology		13% (1/8)
Managing pharmacist	50% (7/14)
Community pharmacist specialist	21% (3/14)
Community pharmcist specilist in training	21% (3/14)
Second pharmacist	7.1% (1/14)
How long have you been working as a pharmacist/physician?
Mean	9.4 years (14/14)	13 years (7/8)
Range	2 - 25 years (14/14)	4 - 22 years (7/8)
Pharmacy location
City	71% (10/14)
Rural	29% (4/14)
Pharmacy located in a health center
Yes	64% (9/14)
No	36% (5/14)
Percentages may not add to 100% because of rounding
