# Supplementary material for: Feasibility of Community Pharmacist-Initiated and Point-of-Care CYP2C19 Genotype-Guided De-Escalation of Oral P2Y12 Inhibitors
Source: Genes (Basel). 2023 Feb 25;14(3):578. doi: 10.3390/genes14030578 (PMC10048116; doi:10.3390/genes14030578)
Supplement: Supplementary file 1 [file genes-14-00578-s001.zip › Table S5 Barrier scores and matrix ranking of community pharmacists.xlsx]

## Sheet: Sheet1
Respondents	Limited physical space in the pharmacy	Lack of reimbursement	Limited time to commit to PGx-testing	Costs associated with POC PGx-testing	Knowledge of PGx	Lack of interest from patients	Insufficient pharmacy staff to provide PGx-testing	Poor adherence to recommendations by cardiologists	Limited perceived added value to current practice	Not knowing if a patient has already been genotyped
1	10	2	8	1	6	5	9	3	7	4
2	6	1	8	2	5	9	7	4	10	3
3	9	7	5	4	2	3	6	8	10	1
4	10	1	4	2	7	5	3	6	8	9
5	9	2	5	1	10	6	7	3	8	4
6	7	1	6	2	8	10	5	3	9	4
7	10	1	2	6	5	8	3	7	9	4
8	10	2	5	1	4	9	3	6	8	7
9	9	2	1	3	8	7	4	10	6	5
10	8	1	5	2	9	4	3	7	10	6
11	9	4	1	3	10	8	2	5	6	7
12	6	4	1	5	7	8	2	3	10	9
13	9	2	5	4	8	7	6	1	10	3
14	1	4	5	3	6	9	2	8	10	7
Ranking	Frequencies
1	1	5	3	3	0	0	0	1	0	1	14
2	0	5	1	4	1	0	3	0	0	0	14
3	0	0	0	3	0	1	4	4	0	2	14
4	0	3	1	2	1	1	1	1	0	4	14
5	0	0	6	1	2	2	1	1	0	1	14
6	2	0	1	1	2	1	2	2	2	1	14
7	1	1	0	0	2	2	2	2	1	3	14
8	1	0	2	0	3	3	0	2	3	0	14
9	5	0	0	0	1	3	1	0	2	2	14
10	4	0	0	0	2	1	0	1	6	0	14
Total	14	14	14	14	14	14	14	14	14	14	Total
	Rank 1	Rank 2	Rank 3	Rank 4	Rank 5	Rank 6	Rank 7	Rank 8	Rank 9	Rank 10			Total	Rank	Total/14		In order of appearance	Rank Score		First to Last	Rank Score
Limited physical space in the pharmacy	1	0	0	0	0	2	1	1	5	4		Limited physical space in the pharmacy	41	9	2.92857		Limited physical space in the pharmacy	2.9		Lack of reimbursement	8.6
Lack of reimbursement	5	5	0	3	0	0	1	0	0	0		Lack of reimbursement	120	1	8.57143		Lack of reimbursement	8.6		Costs associated with POC PGx-testing	8.2
Limited time to commit to PGx-testing	3	1	0	1	6	1	0	2	0	0		Limited time to commit to PGx-testing	93	3	6.64286		Limited time to commit to PGx-testing	6.6		Limited time to commit to PGx-testing	6.6
Costs associated with POC PGx-testing	3	4	3	2	1	1	0	0	0	0		Costs associated with POC PGx-testing	115	2	8.21429		Costs associated with POC PGx-testing	8.2		Insufficient pharmacy staff to provide PGx-testing	6.6
Knowledge of PGx	0	1	0	1	2	2	2	3	1	2		Knowledge of PGx	59	7	4.21429		Knowledge of PGx	4.2		Not knowing if a patient has already been genotyped	5.8
Lack of interest from patients	0	0	1	1	2	1	2	3	3	1		Lack of interest from patients	56	8	4		Lack of interest from patients	4		Poor adherence to recommendations by cardiologists	5.7
Insufficient pharmacy staff to provide PGx-testing	0	3	4	1	1	2	2	0	1	0		Insufficient pharmacy staff to provide PGx-testing	92	4	6.57143		Insufficient pharmacy staff to provide PGx-testing	6.6		Knowledge of PGx	4.2
Poor adherence to recommendations by cardiologists	1	0	4	1	1	2	2	2	0	1		Poor adherence to recommendations by cardiologists	80	6	5.71429		Poor adherence to recommendations by cardiologists	5.7		Lack of interest from patients	4
Limited perceived added value to current practice	0	0	0	0	0	2	1	3	2	6		Limited perceived added value to current practice	33	10	2.35714		Limited perceived added value to current practice	2.4		Limited physical space in the pharmacy	2.9
Not knowing if a patient has already been genotyped	1	0	2	4	1	1	3	0	2	0		Not knowing if a patient has already been genotyped	81	5	5.78571		Not knowing if a patient has already been genotyped	5.8		Limited perceived added value to current practice	2.4
