# Supplementary figures and images for: Feasibility of Community Pharmacist-Initiated and Point-of-Care CYP2C19 Genotype-Guided De-Escalation of Oral P2Y12 Inhibitors
Source: MDPI journal article supplement (doi:10.3390/genes14030578), 2023-02-25

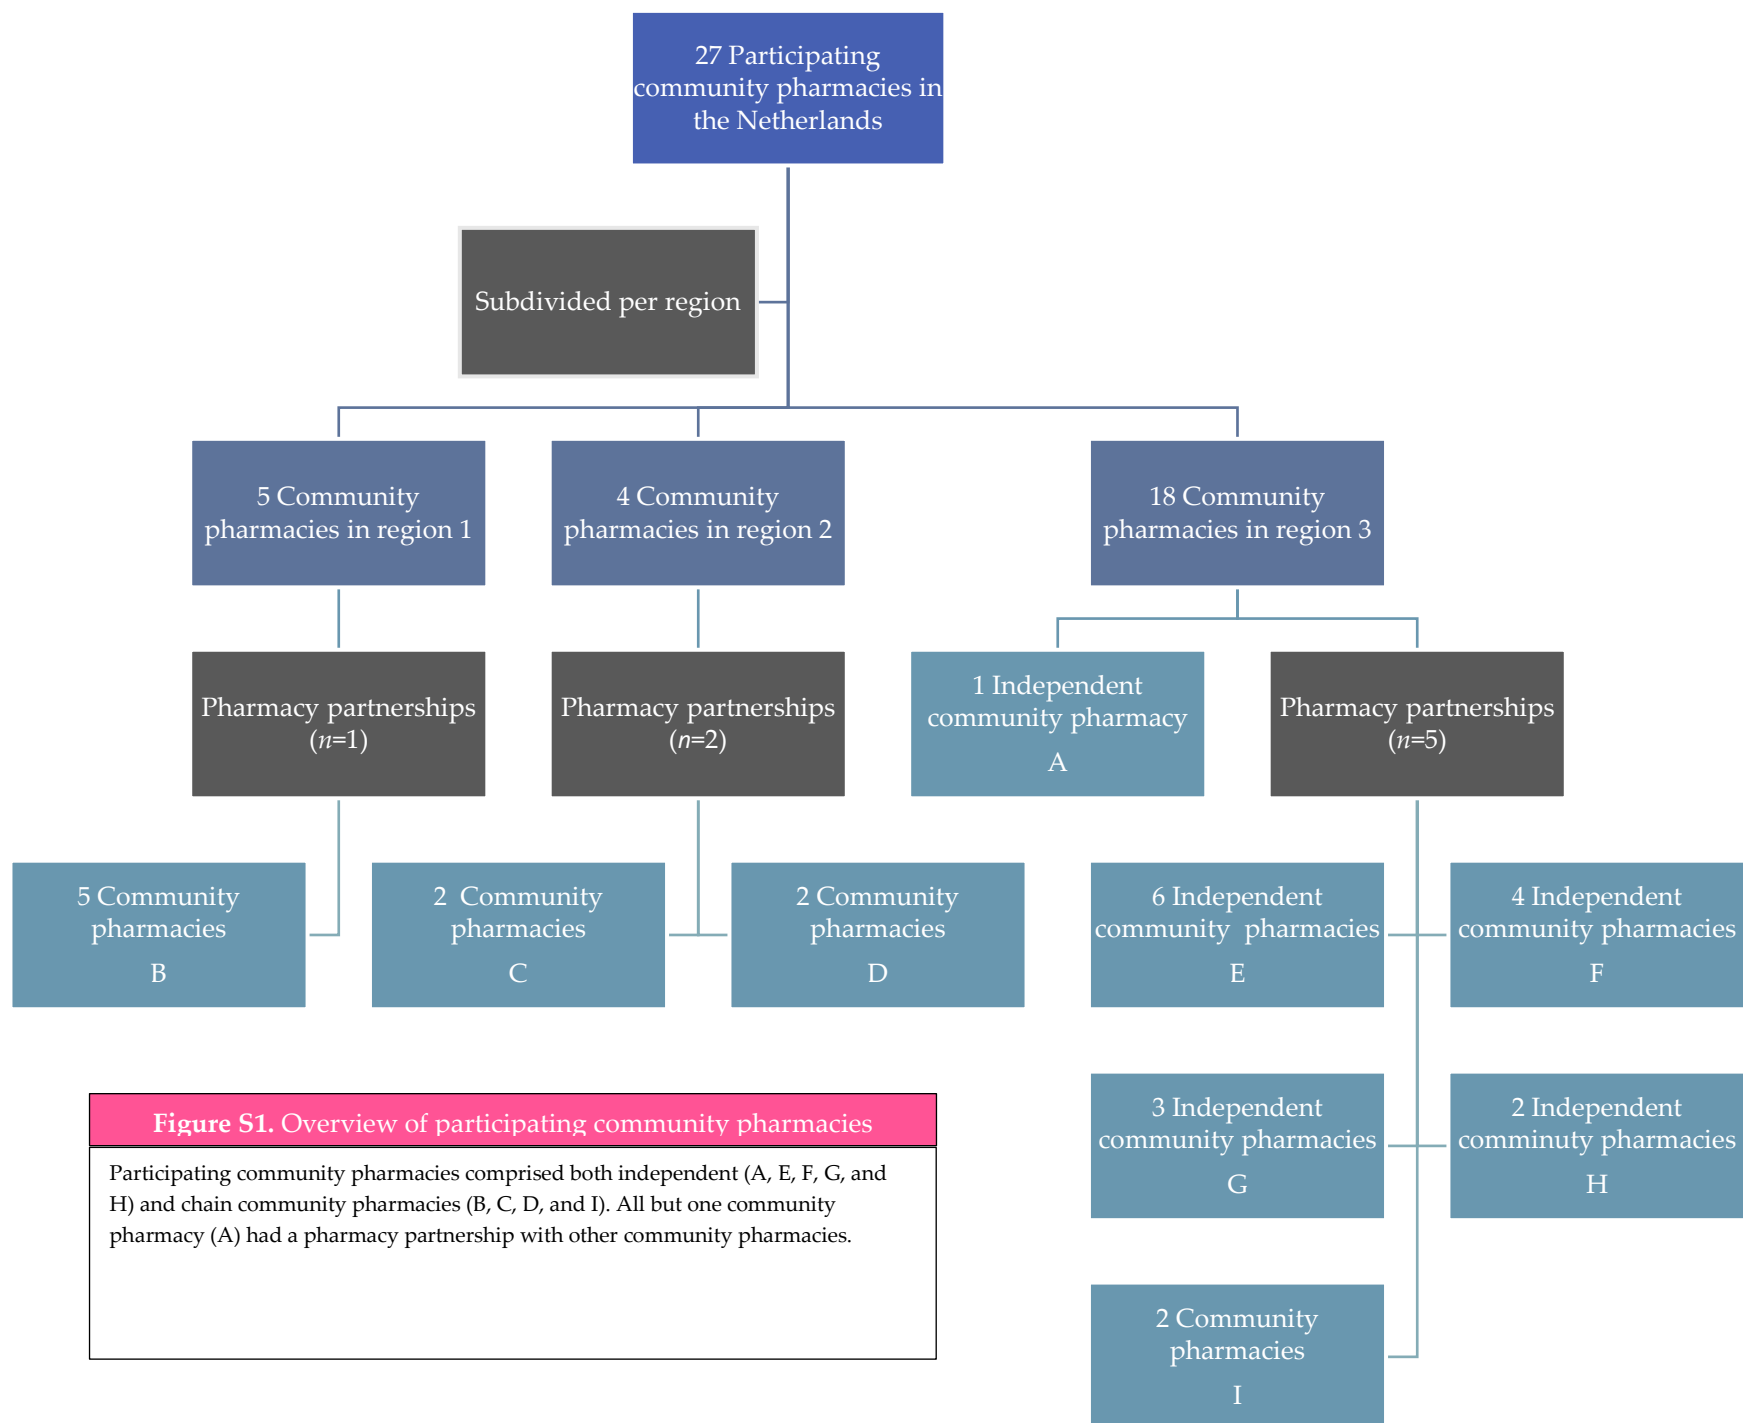

Supplement: s1 [file s1]

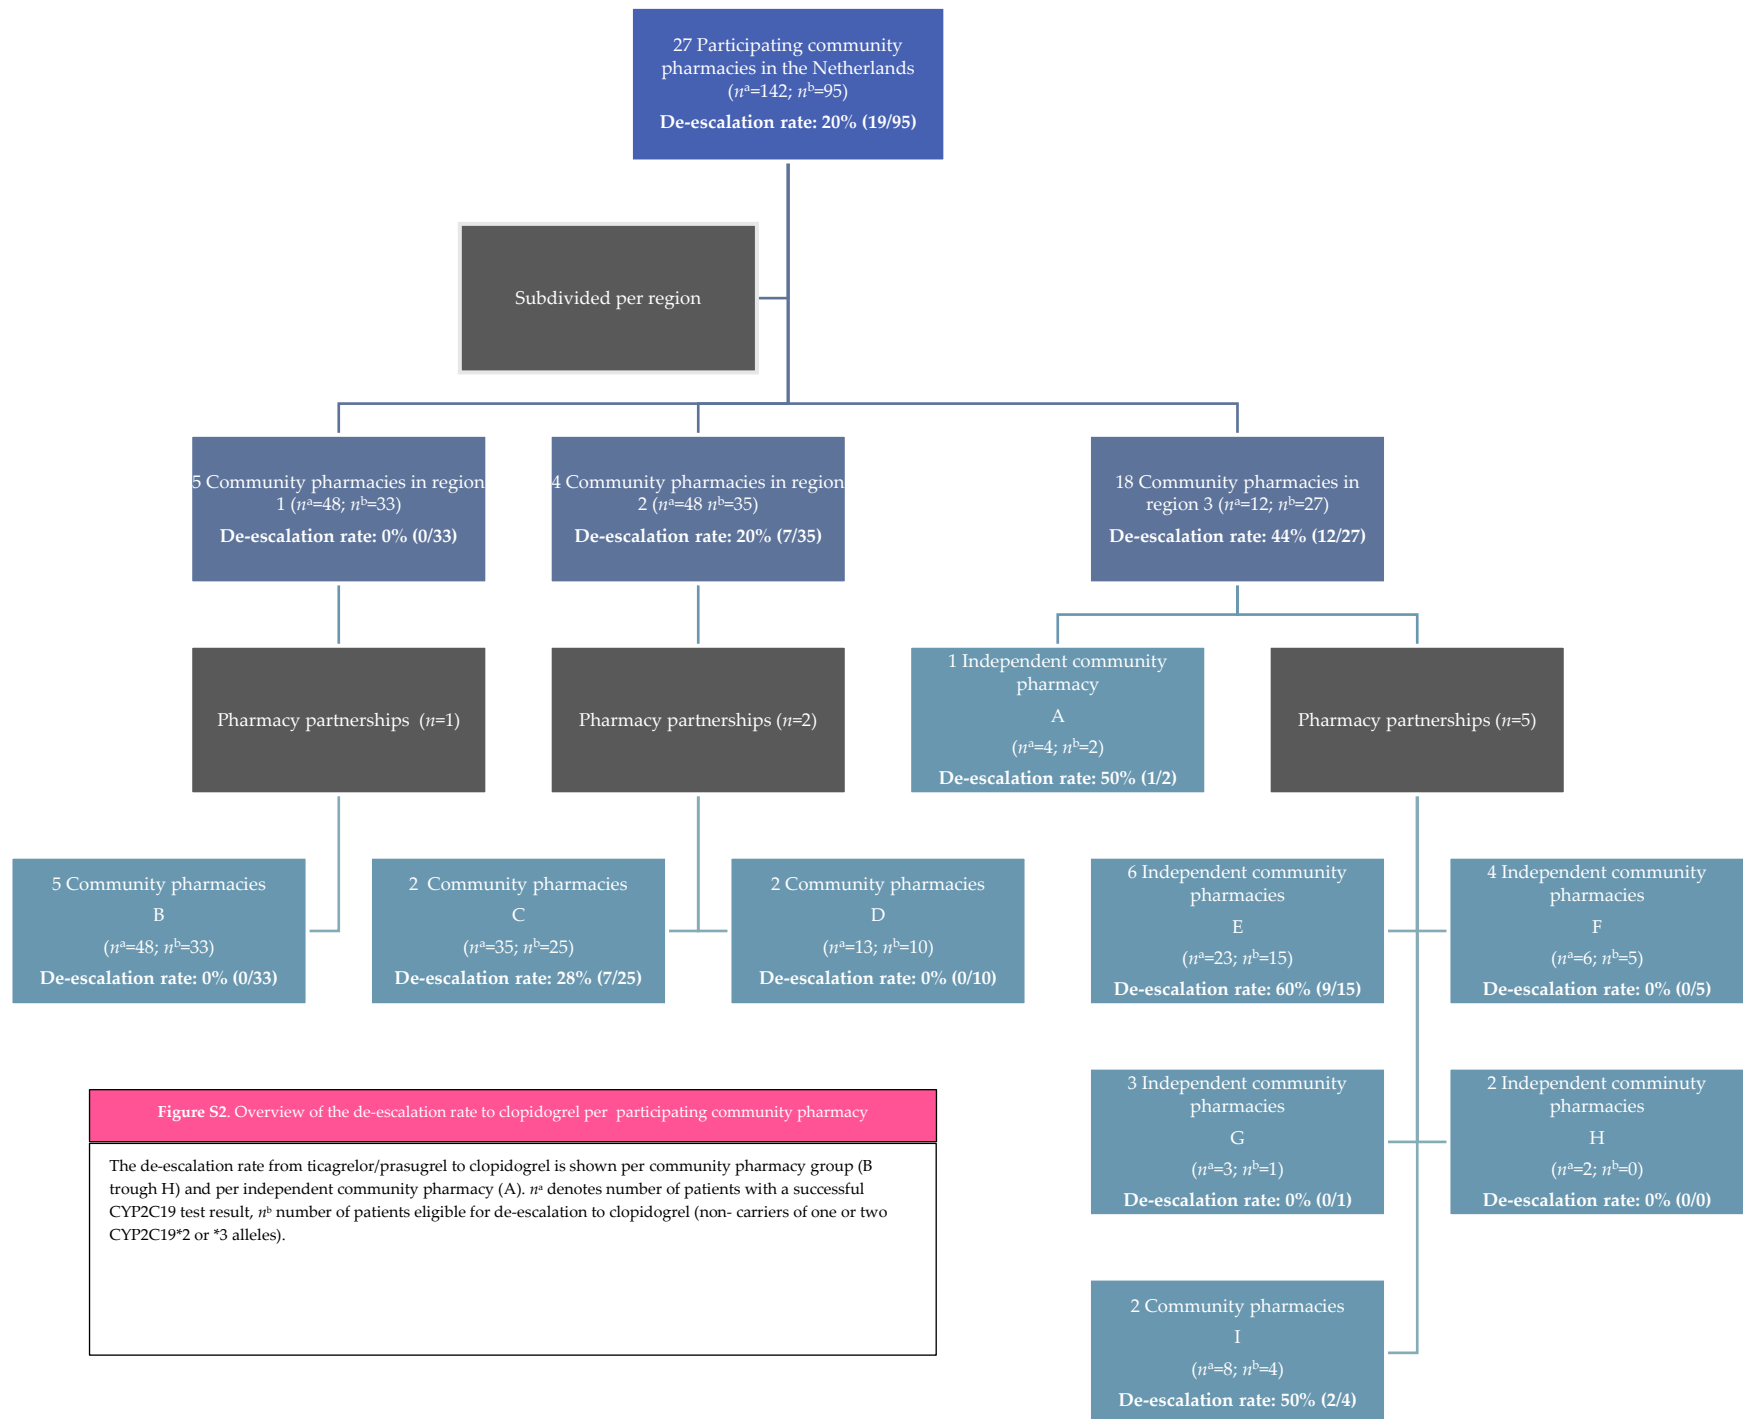

Supplement: s1 [file s1]
